# Supplementary material for: Chicken Hypothalamic and Ovarian DNA Methylome Alteration in Response to Forced Molting
Source: MDPI journal article supplement (doi:10.3390/ani13061012), 2023-03-10
Supplement: s1 [file s1]

---

## Supplementary Material

**Table S1** Statistical analysis for genome-wide DNA methylation sequencing data

| Samples | Raw Reads No.<br>(10 <sup>6</sup> ) | Clean Reads No.<br>(10 <sup>6</sup> ) | N (%)<br>(10 <sup>-4</sup> ) | Q20<br>(%) | Q30<br>(%) | Mapping rate<br>(%) |
|---------|-------------------------------------|---------------------------------------|------------------------------|------------|------------|---------------------|
| 1-1-h   | 207.57                              | 194.95                                | 3.62                         | 95.26      | 89.42      | 87.42               |
| 1-1-o   | 198.94                              | 185.00                                | 2.81                         | 94.93      | 89.12      | 89.66               |
| 1-2-h   | 252.75                              | 240.04                                | 3.60                         | 95.43      | 89.22      | 87.17               |
| 1-2-o   | 257.64                              | 229.35                                | 2.78                         | 93.32      | 87.22      | 87.13               |
| 1-3-h   | 198.41                              | 187.64                                | 3.63                         | 95.35      | 89.28      | 88.90               |
| 1-3-o   | 219.17                              | 200.25                                | 2.86                         | 94.24      | 88.07      | 89.99               |
| 2-1-h   | 215.91                              | 205.48                                | 3.60                         | 95.44      | 89.23      | 89.42               |
| 2-1-o   | 207.98                              | 190.66                                | 2.79                         | 93.73      | 87.33      | 89.40               |
| 2-2-h   | 255.97                              | 242.89                                | 3.60                         | 95.27      | 89.03      | 88.44               |
| 2-2-o   | 201.76                              | 190.63                                | 2.81                         | 95.53      | 89.55      | 87.90               |
| 2-3-h   | 285.94                              | 270.01                                | 3.64                         | 95.51      | 89.58      | 84.55               |
| 2-3-o   | 205.54                              | 192.99                                | 2.80                         | 94.98      | 88.90      | 87.26               |
| 3-1-h   | 266.11                              | 189.92                                | 4.20                         | 95.36      | 89.29      | 90.81               |
| 3-1-o   | 211.14                              | 178.33                                | 4.24                         | 94.84      | 88.60      | 90.65               |
| 3-2-h   | 225.12                              | 204.88                                | 4.19                         | 95.57      | 89.66      | 88.86               |
| 3-2-o   | 236.00                              | 192.22                                | 4.20                         | 95.20      | 89.38      | 90.92               |
| 3-3-h   | 256.75                              | 193.91                                | 4.20                         | 95.65      | 89.84      | 88.39               |
| 3-3-o   | 259.27                              | 199.33                                | 4.22                         | 95.49      | 89.58      | 91.07               |
| 4-1-h   | 199.21                              | 170.42                                | 6.62                         | 94.82      | 88.21      | 86.60               |
| 4-1-o   | 186.41                              | 204.49                                | 5.06                         | 94.48      | 87.56      | 90.07               |
| 4-2-h   | 214.32                              | 198.53                                | 4.98                         | 94.65      | 87.93      | 90.89               |
| 4-2-o   | 202.12                              | 192.68                                | 6.34                         | 94.35      | 87.65      | 92.16               |
| 4-3-h   | 212.69                              | 208.73                                | 7.62                         | 95.19      | 88.59      | 88.26               |
| 4-3-o   | 209.87                              | 176.54                                | 6.85                         | 94.84      | 88.45      | 91.29               |
| 5-1-h   | 222.63                              | 212.72                                | 13.12                        | 95.38      | 89.53      | 90.64               |
| 5-1-o   | 214.89                              | 199.83                                | 7.61                         | 94.88      | 88.35      | 89.87               |

|       |        |        |      |       |       |       |
|-------|--------|--------|------|-------|-------|-------|
| 5-2-h | 213.99 | 207.46 | 6.38 | 95.49 | 89.22 | 90.62 |
| 5-2-o | 223.05 | 203.17 | 6.13 | 94.46 | 87.75 | 88.72 |
| 5-3-h | 244.23 | 218.40 | 7.48 | 95.02 | 88.36 | 87.30 |
| 5-3-o | 246.91 | 185.97 | 6.19 | 94.75 | 88.28 | 88.98 |

Note: Sample: The sample names;

Reads No.: The total reads;

N(%): the percentage of fuzzy bases;

Q20(%): The percentage of bases with a base recognition accuracy of more than 99%;

Q30(%): The percentage of bases with a base recognition accuracy of more than 99.9%;

Mapping rate (%): the rate of reads mapped to chicken reference genomes;

i-j-o (i=1,2,3,4,5; j=1,2,3) stand for three biological replicates from five periods in ovarian samples;

i-j-h (i=1,2,3,4,5; j=1,2,3) stand for three biological replicates from five periods in hypothalamic samples;

**Table S2** The proportion of methylated C sites in CG, CHG and CHH contexts of 30 samples from forced molting

| Samples | mC (%) | mCG (%) | mCHG (%) | mCHH (%) |
|---------|--------|---------|----------|----------|
| 1-1-h   | 4.39   | 88.36   | 1.70     | 9.94     |
| 1-1-o   | 3.72   | 93.23   | 1.07     | 5.70     |
| 1-2-h   | 4.53   | 90.92   | 1.36     | 7.72     |
| 1-2-o   | 3.44   | 93.86   | 1.03     | 5.10     |
| 1-3-h   | 4.30   | 89.60   | 1.58     | 8.82     |
| 1-3-o   | 3.93   | 93.38   | 1.07     | 5.54     |
| 2-1-h   | 4.59   | 78.23   | 3.36     | 18.41    |
| 2-1-o   | 4.03   | 93.47   | 1.08     | 5.45     |
| 2-2-h   | 4.67   | 90.92   | 1.37     | 7.71     |
| 2-2-o   | 4.17   | 93.84   | 1.02     | 5.14     |
| 2-3-h   | 4.65   | 90.69   | 1.40     | 7.91     |
| 2-3-o   | 4.24   | 93.87   | 1.02     | 5.10     |
| 3-1-h   | 4.32   | 92.94   | 1.11     | 5.96     |
| 3-1-o   | 3.04   | 94.45   | 0.94     | 4.61     |
| 3-2-h   | 3.27   | 91.43   | 1.29     | 7.28     |
| 3-2-o   | 4.22   | 94.15   | 1.00     | 4.85     |
| 3-3-h   | 4.38   | 92.16   | 1.20     | 6.64     |
| 3-3-o   | 3.87   | 94.49   | 0.94     | 4.57     |
| 4-1-h   | 3.56   | 91.78   | 1.26     | 6.96     |
| 4-1-o   | 4.38   | 94.14   | 0.99     | 4.87     |
| 4-2-h   | 4.16   | 91.50   | 1.30     | 7.20     |
| 4-2-o   | 4.36   | 94.12   | 0.99     | 4.89     |
| 4-3-h   | 1.42   | 91.98   | 1.24     | 6.78     |
| 4-3-o   | 1.60   | 94.07   | 1.00     | 4.93     |
| 5-1-h   | 4.81   | 76.45   | 3.68     | 19.86    |

|       |      |       |      |      |
|-------|------|-------|------|------|
| 5-1-o | 4.06 | 93.85 | 1.00 | 5.15 |
| 5-2-h | 4.42 | 91.97 | 1.22 | 6.81 |
| 5-2-o | 4.35 | 94.04 | 1.01 | 4.95 |
| 5-3-h | 4.57 | 91.36 | 1.29 | 7.35 |
| 5-3-o | 4.48 | 93.88 | 1.01 | 5.11 |

Note: mC (%) represents the percentage of methylated C sites out of the total number of C sites in the whole genome. The mCG (%), mCHG (%) and mCHH (%) represent the proportion of methylated C sites in all methylated C sites from different sequence environments, where H stands for A, C and T.

**Table S9** The DMGs associated with cellular aging in three different periods

|        |              |            |                                                    |
|--------|--------------|------------|----------------------------------------------------|
| 1-vs-2 | hypothalamus | hyper_DMGs | SYNJ1 [1], UBE3A [2,3], ARHGEF7 [4]                |
|        | hypothalamus | hypo_DMGs  | ATAD2B [5], RARS2 [6], WNT9A [7]                   |
|        | ovary        | hyper_DMGs | DIP2C [8], DOCK7 [9], HSF1 [10]                    |
|        | ovary        | hypo_DMGs  | BRSK1 [11], KCNK2 [12], UBE2D3 [13]                |
| 2-vs-3 | hypothalamus | hyper_DMGs | ABCA1 [14-16], CCPG1 [17], COL4A2 [18]             |
|        | hypothalamus | hypo_DMGs  | GADD45A [19], HOXA3 [20], MEIS1 [21]               |
|        | ovary        | hyper_DMGs | DNAJC1 [22], FBXL7 [23,24], KIF5C [25], PANK3 [26] |
|        | ovary        | hypo_DMGs  | DCLK1 [27-29]                                      |
| 3-vs-5 | hypothalamus | hyper_DMGs | ATOH8 [30], NUMB [31], POT1[32]                    |
|        | hypothalamus | hypo_DMGs  | SEPT5 [33], ZEB2 [34-36], YAP1 [37,38], RXRA [39]  |
|        | ovary        | hyper_DMGs | CEP128 [40], EXOC4 [41], ZDHHC13 [42-44]           |
|        | ovary        | hypo_DMGs  | BIN3 [45], CPXM1 [46], RARB [47,48], RPS15 [49]    |

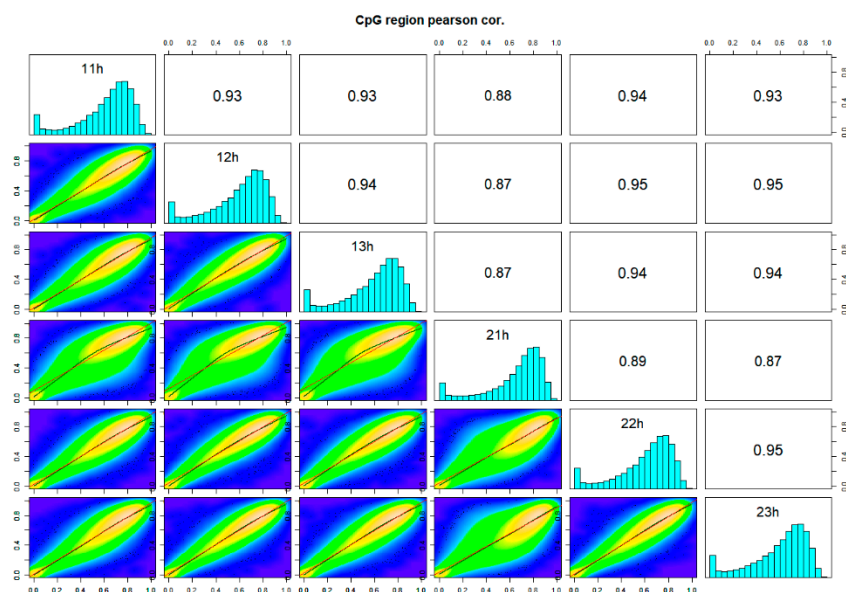

Figure S1. The CpG region correlation of samples for 1-vs-2 group in hypothalamus

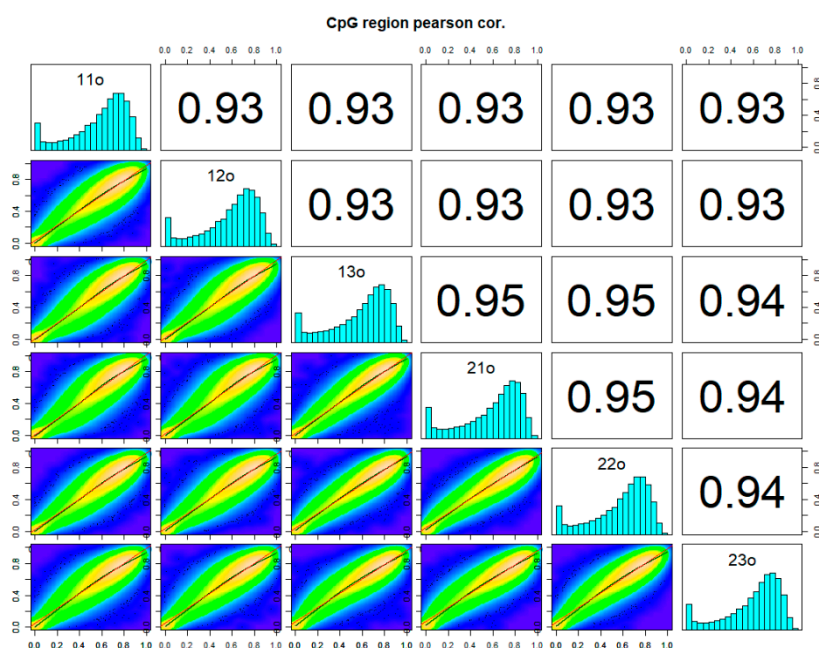

Figure S2. The CpG region correlation of samples for 1-vs-2 group in ovary

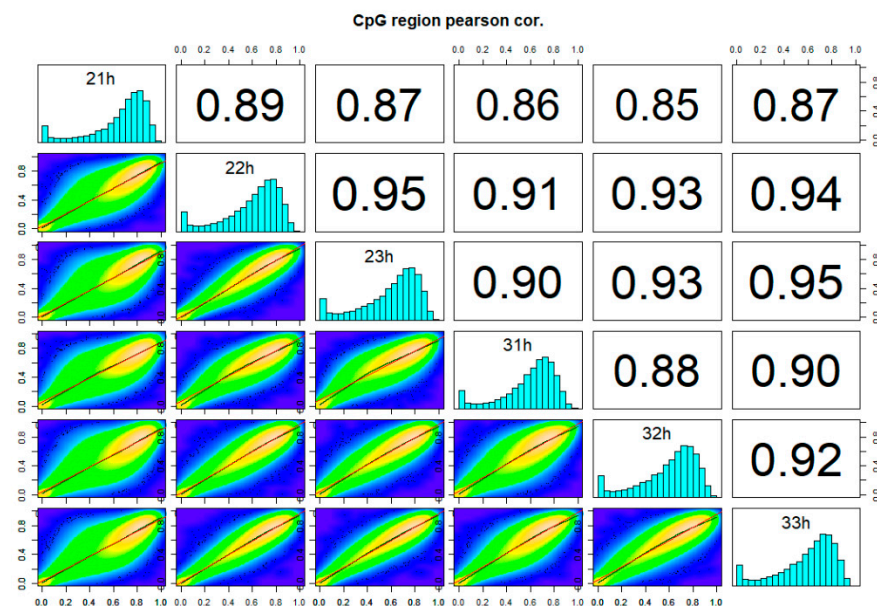

Figure S3. The CpG region correlation of samples for 2-vs-3 group in hypothalamus

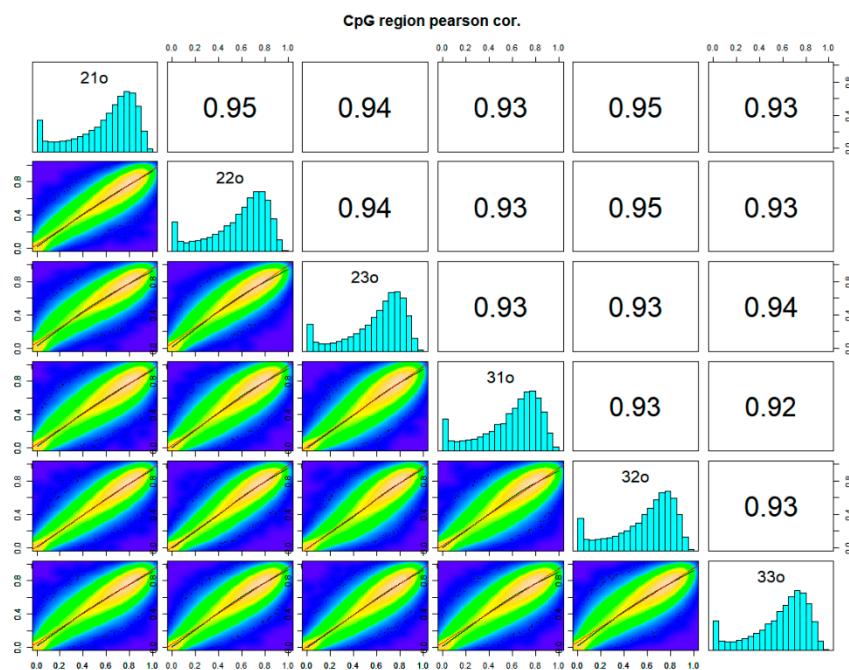

Figure S4. The CpG region correlation of samples for 2-vs-3 group in ovary

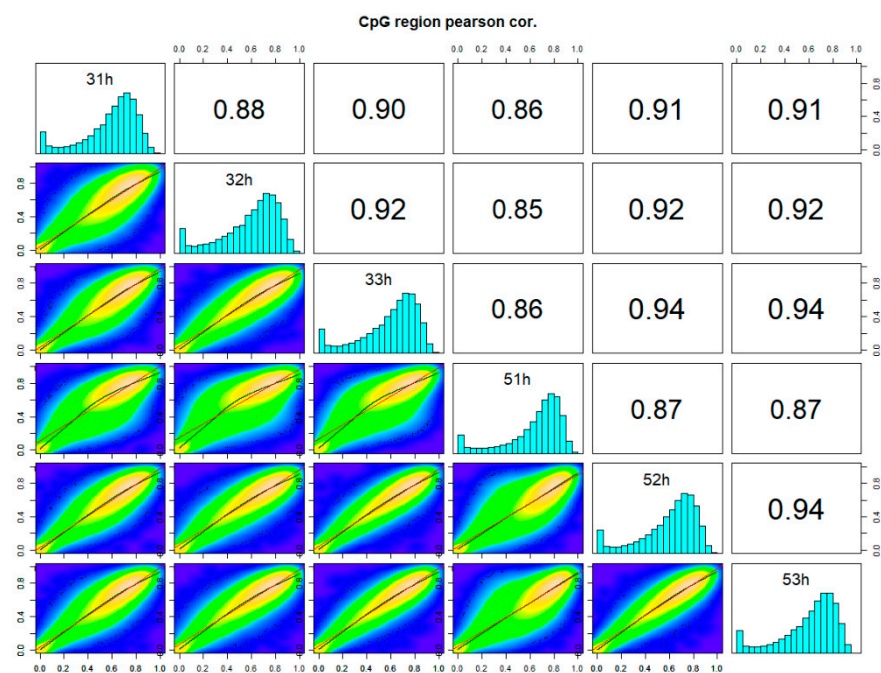

Figure S5. The CpG region correlation of samples for 3-vs-5 group in hypothalamus

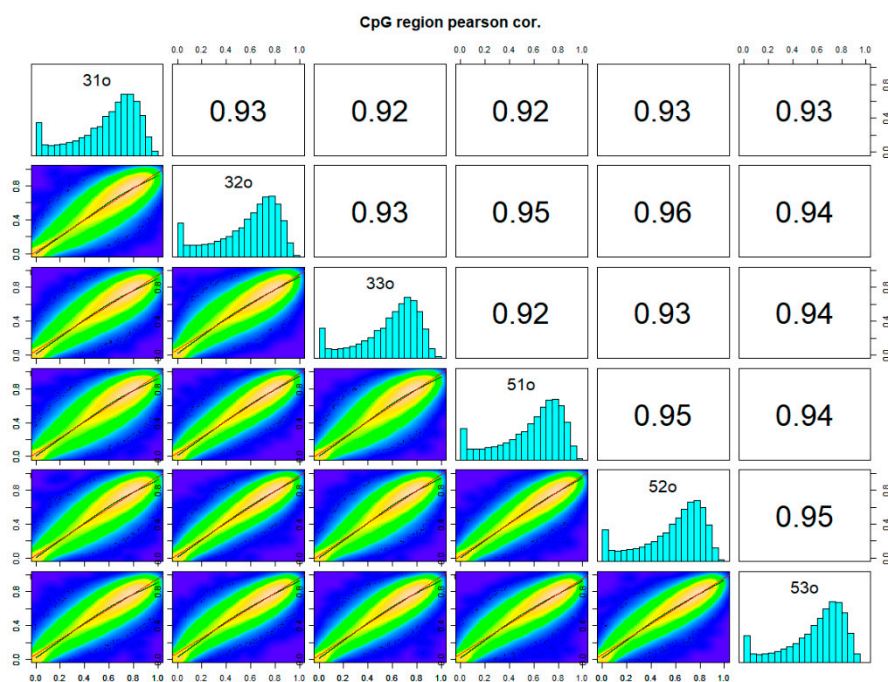

Figure S6. The CpG region correlation of samples for 3-vs-5 group in ovary

## References

1. Samanta, D. & Arya, K. Electroclinical Findings of SYNJ1 Epileptic Encephalopathy. *J*

2. Vatsa, N. & Jana, N. R. UBE3A and Its Link With Autism. *Front Mol Neurosci.* 2018, 11, 448.
3. Elgersma, Y. & Sonzogni, M. UBE3A reinstatement as a disease-modifying therapy for Angelman syndrome. *Dev Med Child Neurol.* 2021, 63, 802-807.
4. López Tobón, A., Suresh, M., Jin, J., Vitriolo, A., Pietralla, T., Tedford, K., Bossenz, M., Mahnken, K., Kiefer, F., Testa, G., Fischer, K. D. & Püschel, A. W. The guanine nucleotide exchange factor Arhgef7/ $\beta$ Pix promotes axon formation upstream of TC10. *Sci Rep.* 2018, 8, 8811.
5. Leachman, N. T., Brellier, F., Ferralli, J., Chiquet-Ehrismann, R. & Tucker, R. P. ATAD2B is a phylogenetically conserved nuclear protein expressed during neuronal differentiation and tumorigenesis. *Dev Growth Differ.* 2010, 52, 747-55.
6. Ngoh, A., Bras, J., Guerreiro, R., Meyer, E., McTague, A., Dawson, E., Mankad, K., Gunny, R., Clayton, P., Mills, P. B., Thornton, R., Lai, M., Forsyth, R. & Kurian, M. A. RARS2 mutations in a sibship with infantile spasms. *Epilepsia.* 2016, 57, e97-e102.
7. Luo, C., Zhou, S., Zhou, Z., Liu, Y., Yang, L., Liu, J., Zhang, Y., Li, H., Liu, Y., Hou, F. F. & Zhou, L. Wnt9a Promotes Renal Fibrosis by Accelerating Cellular Senescence in Tubular Epithelial Cells. *J Am Soc Nephrol.* 2018, 29, 1238-1256.
8. Larsson, C., Ali, M. A., Pandzic, T., Lindroth, A. M., He, L. & Sjöblom, T. Loss of DIP2C in RKO cells stimulates changes in DNA methylation and epithelial-mesenchymal transition. *BMC cancer.* 2017, 17, 487.
9. Le, P. T., Bishop, K. A., Maridas, D. E., Motyl, K. J., Brooks, D. J., Nagano, K., Baron, R., Bouxsein, M. L. & Rosen, C. J. Spontaneous mutation of Dock7 results in lower trabecular bone mass and impaired periosteal expansion in aged female Misty mice. *Bone.* 2017, 105, 103-114.
10. Kruta, M., Sunshine, M. J., Chua, B. A., Fu, Y., Chawla, A., Dillingham, C. H., Hidalgo San Jose, L., De Jong, B., Zhou, F. J. & Signer, R. A. J. Hsf1 promotes hematopoietic stem cell fitness and proteostasis in response to ex vivo culture stress and aging. *Cell stem cell.* 2021, 28, 1950-1965.e6.
11. Qin, Y., Sun, M., You, L., Wei, D., Sun, J., Liang, X., Zhang, B., Jiang, H., Xu, J. & Chen, Z. J. ESR1, HK3 and BRSK1 gene variants are associated with both age at natural menopause and premature ovarian failure. *Orphanet J Rare Dis.* 2012, 7, 5.
12. Innamaa, A., Jackson, L., Asher, V., van Schalkwyk, G., Warren, A., Keightley, A., Hay, D., Bali, A., Sowter, H. & Khan, R. Expression and effects of modulation of the K2P potassium channels TREK-1 (KCNK2) and TREK-2 (KCNK10) in the normal human ovary and epithelial ovarian cancer. *Clin Transl Oncol.* 2013 15, 910-8.
13. Gibson, J., Russ, T. C., Clarke, T. K., Howard, D. M., Hillary, R. F., Evans, K. L., Walker, R. M., Bermingham, M. L., Morris, S. W., Campbell, A., Hayward, C., Murray, A. D., Porteous, D. J., Horvath, S., Lu, A. T., McIntosh, A. M., Whalley, H. C. & Marioni, R. E. A meta-analysis of genome-wide association studies of epigenetic age acceleration. *PLoS Genet.* 2019, 15, e1008104.
14. Guay, S. P., Légaré, C., Houde, A. A., Mathieu, P., Bossé, Y. & Bouchard, L. Acetylsalicylic acid, aging and coronary artery disease are associated with ABCA1 DNA methylation in men. *Clin Epigenetics.* 2014, 6, 14.
15. Mockute, R., Vilkeviciute, A., Balciuniene, V. J., Zemaitiene, R. & Liutkeviciene, R. ABCA1 rs1883025 and CYP4F2 rs2108622 Gene Polymorphism Association with Age-Related Macular Degeneration and Anti-VEGF Treatment. *Medicina.* 2021, 57(9):974.
16. Tian, M., Zhang, X., Wang, L. & Li, Y. Curcumin induces ABCA1 expression and apolipoprotein A-I-mediated cholesterol transmembrane in the chronic cerebral hypoperfusion aging rats. *Am J Chin Med.* 2013, 41, 1027-42.
17. Zohar, K., Lezmi, E., Eliyahu, T. & Linial, M. Ladostigil Attenuates Induced Oxidative Stress in Human Neuroblast-like SH-SY5Y Cells. *Biomedicines.* 2021, 9(9):1251.

- 
18. Kanazawa, Y., Nagano, M., Koinuma, S., Sugiyo, S. & Shigeyoshi, Y. Effects of aging on basement membrane-related gene expression of the skeletal muscle in rat. *Biomed Res.* 2021, 42(3):115-119.
  19. Diao, D., Wang, H., Li, T., Shi, Z., Jin, X., Sperka, T., Zhu, X., Zhang, M., Yang, F., Cong, Y., Shen, L., Zhan, Q., Yan, J., Song, Z. & Ju, Z. Telomeric epigenetic response mediated by Gadd45a regulates stem cell aging and lifespan. *EMBO Rep.* 2018, 19(10): e45494.
  20. Turner, D. C., Gorski, P. P., Maasar, M. F., Seaborne, R. A., Baumert, P., Brown, A. D., Kitchen, M. O., Erskine, R. M., Dos-Remedios, I., Voisin, S., Eynon, N., Sultanov, R. I., Borisov, O. V., Larin, A. K., Semenova, E. A., Popov, D. V., Generozov, E. V., Stewart, C. E., Drust, B., Owens, D. J., Ahmetov, II & Sharples, A. P. DNA methylation across the genome in aged human skeletal muscle tissue and muscle-derived cells: the role of HOX genes and physical activity. *Sci Rep.* 2020, 10(1):15360.
  21. Chang-Panesso, M., Kadyrov, F. F., Machado, F. G., Kumar, A. & Humphreys, B. D. Meis1 is specifically upregulated in kidney myofibroblasts during aging and injury but is not required for kidney homeostasis or fibrotic response. *Am J Physiol-Renal.* 2018, 315, F275-f290.
  22. Lindsey, J. C., Lusher, M. E., Strathdee, G., Brown, R., Gilbertson, R. J., Bailey, S., Ellison, D. W. & Clifford, S. C. Epigenetic inactivation of MCJ (DNAJD1) in malignant paediatric brain tumours. *Int J Cancer.* 2006, 118(2):346-52.
  23. Moro, L. & Pagano, M. Epigenetic suppression of FBXL7 promotes metastasis. *Mol Cell Oncol.* 2020, 7(6):1833698..
  24. Chiu, H. W., Chang, J. S., Lin, H. Y., Lee, H. H., Kuei, C. H., Lin, C. H., Huang, H. M. & Lin, Y. F. FBXL7 Upregulation Predicts a Poor Prognosis and Associates with a Possible Mechanism for Paclitaxel Resistance in Ovarian Cancer. *J Clin Med.* 2018, 7(10):330.
  25. Dathe, V., Pröls, F. & Brand-Saberi, B. Expression of kinesin kif5c during chick development. *Anat Embryol.* 2004, 207, 475-80.
  26. Li, J., Li, C., Li, Q., Li, G., Li, W., Li, H., Kang, X. & Tian, Y. Novel Regulatory Factors in the Hypothalamic-Pituitary-Ovarian Axis of Hens at Four Developmental Stages. *Front Genet.* 2020, 11, 591672.
  27. Cheng, L., Yang, Z., Guo, W., Wu, C., Liang, S., Tong, A., Cao, Z., Thorne, R. F., Yang, S. Y., Yu, Y. & Chen, Q. DCLK1 autoinhibition and activation in tumorigenesis. *Innovation.* 2020, 3, 100191.
  28. Nevi, L., Di Matteo, S., Carpino, G., Zizzari, I. G., Samira, S., Ambrosino, V., Costantini, D., Overi, D., Giancotti, A., Monti, M., Bosco, D., De Peppo, V., Oddi, A., De Rose, A. M., Melandro, F., Bragazzi, M. C., Faccioli, J., Massironi, S., Grazi, G. L., Panici, P. B., Berloco, P. B., Giuliente, F., Cardinale, V., Invernizzi, P., Caretti, G., Gaudio, E. & Alvaro, D. DCLK1, a Putative Stem Cell Marker in Human Cholangiocarcinoma. *Hepatology.* 2021, 73, 144-159.
  29. Liu, W., Wang, S., Sun, Q., Yang, Z., Liu, M. & Tang, H. DCLK1 promotes epithelial-mesenchymal transition via the PI3K/Akt/NF- $\kappa$ B pathway in colorectal cancer. *Int J Cancer.* 2018, 142, 2068-2079.
  30. Keder, A., Tardieu, C., Malong, L., Filia, A., Kashkenbayeva, A., Newton, F., Georgiades, M., Gale, J. E., Lovett, M., Jarman, A. P. & Albert, J. T. Homeostatic maintenance and age-related functional decline in the Drosophila ear. *Sci Rep.* 2020, 10, 7431.
  31. De Gasperi, R., Mo, C., Azulai, D., Wang, Z., Harlow, L. M., Du, Y., Graham, Z., Pan, J., Liu, X. H., Guo, L., Zhang, B., Ko, F., Raczkowski, A. M., Bauman, W. A., Goulbourne, C. N., Zhao, W., Brotto, M. & Cardozo, C. P. Numb is required for optimal contraction of skeletal muscle. *J Cachexia Sarcopenia Muscle.* 2022, 13, 454-466.
  32. Li, T., Luo, Z., Lin, S., Li, C., Dai, S., Wang, H., Huang, J., Ma, W., Songyang, Z. & Huang, Y. MiR-185 targets POT1 to induce telomere dysfunction and cellular senescence. *Aging.* 2020, 12, 14791-14807.
  33. Khairat, J. E., Balasubramaniam, V., Othman, I., Omar, A. R. & Hassan, S. S. Interaction of



---

Recombinant Gallus gallus SEPT5 and Brain Proteins of H5N1-Avian Influenza Virus-Infected Chickens. *Proteomes*. 2017, 5(3):23.

34. Epifanova, E., Babaev, A., Newman, A. G. & Tarabykin, V. Role of Zeb2/Sip1 in neuronal development. *Brain Res*. 2019, 1705, 24-31.
35. Huang, X., Ferris, S. T., Kim, S., Choudhary, M. N. K., Belk, J. A., Fan, C., Qi, Y., Sudan, R., Xia, Y., Desai, P., Chen, J., Ly, N., Shi, Q., Bagadia, P., Liu, T., Williams, M., Egawa, T., Colonna, M., Diamond, M. S., Murphy, T. L., Satpathy, A. T., Wang, T. & Murphy, K. M. Differential usage of transcriptional repressor Zeb2 enhancers distinguishes adult and embryonic hematopoiesis. *Immunity*. 2021, 54, 1417-1432.e7.
36. Hegarty, S. V., Sullivan, A. M. & O'Keefe, G. W. Zeb2: A multifunctional regulator of nervous system development. *Prog Neurobiol*. 2015, 132, 81-95.
37. Chen, X., Li, Y., Luo, J. & Hou, N. Molecular Mechanism of Hippo-YAP1/TAZ Pathway in Heart Development, Disease, and Regeneration. *Front Physiol*. 2020, 11, 389.
38. Molina, L., Nejak-Bowen, K. & Monga, S. P. Role of YAP1 Signaling in Biliary Development, Repair, and Disease. *Semin Liver Dis*. 2022, 42, 17-33.
39. Ma, X., Warnier, M., Raynard, C., Ferrand, M., Kirsh, O., Defosse, P. A., Martin, N. & Bernard, D. The nuclear receptor RXRA controls cellular senescence by regulating calcium signaling. *Aging cell*. 2018, 17, e12831.
40. Li, R., Yang, Y. E., Yin, Y. H., Zhang, M. Y., Li, H. & Qu, Y. Q. Methylation and transcriptome analysis reveal lung adenocarcinoma-specific diagnostic biomarkers. *J Transl Med*. 2019, 17, 324.
41. He, Y., Zhou, X., Zheng, R., Jiang, Y., Yao, Z., Wang, X., Zhang, Z., Zhang, H., Li, J. & Yuan, X. The Association of an SNP in the EXOC4 Gene and Reproductive Traits Suggests Its Use as a Breeding Marker in Pigs. *Animals*. 2021, 11(2):521.
42. Shen, L. F., Chen, Y. J., Liu, K. M., Haddad, A. N. S., Song, I. W., Roan, H. Y., Chen, L. Y., Yen, J. J. Y., Chen, Y. J., Wu, J. Y. & Chen, Y. T. Role of S-Palmitoylation by ZDHHC13 in Mitochondrial function and Metabolism in Liver. *Sci Rep*. 2017, 7, 2182.
43. Liu, Y., Xu, Q., Kang, X., Wang, K., Wang, J., Feng, D., Bai, Y. & Fang, M. Dynamic changes of genomic methylation profiles at different growth stages in Chinese Tan sheep. *J Anim Sci Biotechnol*. 2021, 12, 118.
44. Cao, Y., Jin, H. G., Ma, H. H. & Zhao, Z. H. Comparative analysis on genome-wide DNA methylation in longissimus dorsi muscle between Small Tailed Han and Dorper×Small Tailed Han crossbred sheep. *Asian-Australas J Anim Sci*. 2017, 30, 1529-1539.
45. Ramalingam, A., Duhadaway, J. B., Sutanto-Ward, E., Wang, Y., Dinchuk, J., Huang, M., Donover, P. S., Boulden, J., McNally, L. M., Soler, A. P., Muller, A. J., Duncan, M. K. & Prendergast, G. C. Bin3 deletion causes cataracts and increased susceptibility to lymphoma during aging. *Cancer Res*. 2008, 68, 1683-90.
46. Zheng, M., Long, J., Chelariu-Raicu, A., Mullikin, H., Vilsmaier, T., Vattai, A., Heidegger, H. H., Batz, F., Keckstein, S., Jeschke, U., Trillsch, F., Mahner, S. & Kaltofen, T. Identification of a Novel Tumor Microenvironment Prognostic Signature for Advanced-Stage Serous Ovarian Cancer. *Cancers*. 2021, 13(13):3343.
47. Losi-Guembarovski, R., Kuasne, H., Guembarovski, A. L., Rainho, C. A. & Cólus, I. M. DNA methylation patterns of the CDH1, RARB, and SFN genes in choroid plexus tumors. *Cancer Genet Cytogenet*. 2007, 179, 140-5.
48. Udhane, S. S. & Flück, C. E. Regulation of human (adrenal) androgen biosynthesis-New insights from novel throughput technology studies. *Biochem Pharmacol*. 2016, 102, 20-33.
49. Wu, S., Xu, S., Li, R., Li, K., Zhong, X., Li, Y., Zhou, Z., Liu, Y., Feng, R., Zheng, J., Songyang, Z. & Liu, F. mTORC1-Rps15 Axis Contributes to the Mechanisms Underlying Global Translation Reduction During Senescence of Mouse Embryonic Fibroblasts. *Front Cell Dev Biol*. 2019, 7, 337.
